# Supplementary material for: The Prevalence and Determinants of Taenia multiceps Infection (Cerebral Coenurosis) in Small Ruminants in Africa: A Systematic Review
Source: MDPI journal article supplement (doi:10.3390/parasitologia2020013), 2022-06-10
Supplement: s1 [file s1]

Archive with 1 entries (1 files):
- parasitologia-1713991-supplementary.pdf
