# Supplementary material for: The Prevalence and Determinants of Taenia multiceps Infection (Cerebral Coenurosis) in Small Ruminants in Africa: A Systematic Review
Source: MDPI journal article supplement (doi:10.3390/parasitologia2020013), 2022-06-10
Supplement: s1 [file s1 › parasitologia-1713991-supplementary.pdf]

Table S1. Full search strategies for databases searches

| Date search performed      | Database       | Total articles retrieved | Search string /terms and limit                                                                                                                                                                                                                                                                                                                                                                                                                                                                               |
|----------------------------|----------------|--------------------------|--------------------------------------------------------------------------------------------------------------------------------------------------------------------------------------------------------------------------------------------------------------------------------------------------------------------------------------------------------------------------------------------------------------------------------------------------------------------------------------------------------------|
| 20 <sup>th</sup> July 2020 | Google Scholar | 402                      | Allintitle: Coenurosis OR Cenurosis OR "Cerebral coenurosis" OR " <i>Taenia multiceps</i> " OR " <i>Coenurus cerebralis</i> " OR Ormilo                                                                                                                                                                                                                                                                                                                                                                      |
| 20 <sup>th</sup> July 2020 | PubMed         | 39                       | ((Coenurosis [Title] OR Cenurosis [Title] OR "Cerebral coenurosis" [Title] OR " <i>Taenia multiceps</i> " [Title] OR " <i>Coenurus cerebralis</i> " [Title] OR Ormilo [Title]) AND (Africa*[Title/Abstract]))                                                                                                                                                                                                                                                                                                |
| 20 <sup>th</sup> July 2020 | EBSCOhost      | 86                       | TI (Coenurosis OR Cenurosis OR "Cerebral coenurosis" OR " <i>Taenia multiceps</i> " OR " <i>Coenurus cerebralis</i> " OR Ormilo) OR AB (Coenurosis OR Cenurosis OR "Cerebral coenurosis" OR " <i>Taenia multiceps</i> " OR " <i>Coenurus cerebralis</i> " OR Ormilo)<br><br>AND<br><br>GE(Africa*)                                                                                                                                                                                                           |
| 20 <sup>th</sup> July 2020 | Research4life  | 47                       | ((Title combined: (Coenurosis OR Cenurosis OR "Cerebral OR coenurosis" OR " <i>Taenia</i> OR <i>multiceps</i> " OR " <i>Coenurus</i> OR <i>cerebralis</i> " OR Ormilo)) OR (Abstract:(Coenurosis OR Cenurosis OR "Cerebral coenurosis" OR " <i>Taenia multiceps</i> " OR " <i>Coenurus cerebralis</i> " OR Ormilo)) OR (Subject Terms:(Coenurosis OR Cenurosis OR "Cerebral coenurosis" OR " <i>Taenia multiceps</i> " OR " <i>Coenurus cerebralis</i> " OR Ormilo))) AND ((Geographic Locations:(Africa*))) |

Table S2. Full-text articles excluded, with reasons

| Article ID | Title                                                                                                                                                                                                                      | Author(s)                                                                                                                                                      | Year | DOI                       | Criteria for exclusion                             |
|------------|----------------------------------------------------------------------------------------------------------------------------------------------------------------------------------------------------------------------------|----------------------------------------------------------------------------------------------------------------------------------------------------------------|------|---------------------------|----------------------------------------------------|
| 5          | Coenurosis in slab-slaughtered sheep and goats in Ngorongoro district: prevalence and predisposing factors of the disease                                                                                                  | Miran, Miran Bushelegi                                                                                                                                         | 2015 | 10.1007/s11250-015-0903-7 | Duplicate                                          |
| 8          | High mortality associated with tapeworm parasitism in geladas ( <i>Theropithecus gelada</i> ) in the Simien Mountains National Park, Ethiopia                                                                              | Schneider-Crease, India; Griffin, Randi H.; Gomery, Megan A.; Bergman, Thore J.; Beehner, Jacinta C.                                                           | 2017 | 10.1002/ajp.22684         | No primary data/summary statistics are presented   |
| 33         | "Ormilo disease" a disorder of zebu cattle in Tanzania: bovine cerebral theileriosis or new protozoan disease?                                                                                                             | Catalano, Deborah; Biasibetti, Elena; Lynen, Godelieve; Di Giulio, Giuseppe; De Meneghi, Daniele; Tomassone, Laura; Valenza, Federico; Capucchio, Maria Teresa | 2015 | 10.1007/s11250-015-0805-8 | As o primary data/summary statistics are presented |
| 40         | Recent Findings from University of Glasgow Provide New Insights into Veterinary Medicine ( <i>Taenia multiceps</i> coenurosis in Tanzania: a major and under-recognised livestock disease problem in pastoral communities) | Not set                                                                                                                                                        | 2019 | Not found                 | Duplicate                                          |

Table S2. Full-text articles excluded, with reasons cont...

| Article ID | Title                                                                                                                                   | Author(s)                                                                                                                                                                                | Year | DOI                                 | Criteria for exclusion                              |
|------------|-----------------------------------------------------------------------------------------------------------------------------------------|------------------------------------------------------------------------------------------------------------------------------------------------------------------------------------------|------|-------------------------------------|-----------------------------------------------------|
| 46         | Review on cerebral coenurosis in small ruminants                                                                                        | Gashe, Misretaw;<br>Sewalem, Moges                                                                                                                                                       | 2017 | DOI: 10.5829/idosi.apg.2017.130.138 | As no primary data/summary statistics are presented |
| 74         | Coenurosis control-break the cycle                                                                                                      | Desta, Hiwot; Alemu, Biruk; Alemayehu, Gezahegn; Wieland, Barbara                                                                                                                        | 2016 | Not found                           | As no primary data/summary statistics are presented |
| 106        | Cerebral coenurosis in small ruminants: a review                                                                                        | Abera, S; Wubit, T; Nejash, A                                                                                                                                                            | 2016 | 10.5455/jasa.20160409121545         | Fulltext not assessible                             |
| 181        | Systematic review and meta-analysis of metacestodes prevalence in small ruminants in Ethiopia                                           | Asmare, Kassahun; Sibhat, Berhanu; Abera, Mesele; Haile, Aynalem; Degefu, Hailu; Fentie, Tsegaw; Bekele, Jemere; Terefe, Getachew; Szonyi, Barbara; Robertson, Lucy J.; Wieland, Barbara | 2016 | 10.1016/j.prevetmed.2016.05.006     | As no primary data/summary statistics are presented |
| 182        | Public health and economic significance cerebral coenurosis in sheep and goat: a review                                                 | Shiferaw, Abera; Abdela, Nejash                                                                                                                                                          | 2016 | 10.5829/idosi.apg.2016.7.2.103108   | As no primary data/summary statistics are presented |
| 192        | Major causes of organs and carcass condemnation in small ruminants slaughtered at Luna Export Abattoir, Oromia Regional State, Ethiopia | Regassa, Alemayehu; Moje, Nebyou; Megersa, Bekele; Beyene, Desta; Sheferaw, Dessie; Debela, Etana; Abunna, Fufa; Skjerve, Eystein                                                        | 2015 | 10.1016/j.prevetmed.2012.11.020     | As no primary data/summary statistics are presented |

Table S2. Full-text articles excluded, with reasons cont...

| Article ID | Title                                                                                                                         | Author(s)                                                                                                                                                                                                                                                                                                                                                                 | Year | DOI                       | Criteria for exclusion                              |
|------------|-------------------------------------------------------------------------------------------------------------------------------|---------------------------------------------------------------------------------------------------------------------------------------------------------------------------------------------------------------------------------------------------------------------------------------------------------------------------------------------------------------------------|------|---------------------------|-----------------------------------------------------|
| 214        | "Ormilo disease" a disorder of zebu cattle in Tanzania: bovine cerebral theileriosis or new protozoan disease?                | Catalano, Deborah; Biasibetti, Elena; Lynen, Godelieve; Di Giulio, Giuseppe; De Meneghi, Daniele; Tomassone, Laura; Valenza, Federico; Capucchio, Maria Teresa                                                                                                                                                                                                            | 2015 | 10.1007/s11250-015-0805-8 | Duplicate                                           |
| 233        | Fitness impacts of tapeworm parasitism on wild gelada monkeys at Guassa, Ethiopia                                             | Nguyen, Nga; Fashing, Peter J.; Boyd, Derek A.; Barry, Tyler S.; Burke, Ryan J.; Goodale, C. Barret; Jones, Sorrel C. Z.; Kerby, Jeffrey T.; Kellogg, Bryce S.; Lee, Laura M.; Miller, Carrie M.; Nurmi, Niina O.; Ramsay, Malcolm S.; Reynolds, Jason D.; Stewart, Kathrine M.; Turner, Taylor J.; Venkataraman, Vivek V.; Knauf, Yvonne; Roos, Christian; Knauf, Sascha | 2015 | 10.1002/ajp.22379         | As no primary data/summary statistics are presented |
| 241        | Clinical, pathological, and molecular data concerning <i>Coenurus cerebralis</i> in Sheep in Egypt                            | Amer, Said; ElKhatam, Ahmed; Fukuda, Yasuhiro; Bakr, Lamia I.; Zidan, Shereif; Elsify, Ahmed; Mohamed, Mostafa A.; Tada, Chika; Nakai, Yutaka                                                                                                                                                                                                                             | 2018 | 10.1016/j.dib.2017.10.070 | Duplicate                                           |
| 243        | <i>Echinococcus granulosus</i> and other intestinal helminths in semi-stray dogs in Tunisia: infection and re-infection rates | Lahmar, Samia; Sarciron, Marie-Elisabeth; Rouiss, Mondher; Mensi, Mohamed                                                                                                                                                                                                                                                                                                 | 2017 | 10.1017/pao.2017.21       | As no primary data/summary statistics are presented |

Table S2. Full-text articles excluded, with reasons cont...

| Article ID | Title                                                                                                                                                                                                         | Author(s)                                                                                                              | Year | DOI                            | Criteria for exclusion                              |
|------------|---------------------------------------------------------------------------------------------------------------------------------------------------------------------------------------------------------------|------------------------------------------------------------------------------------------------------------------------|------|--------------------------------|-----------------------------------------------------|
| 255        | Participatory Epidemiology of <i>Coenurus Cerebralis</i> Infections in Goats and Sheep kept by Pastoralists in Ngorongoro District, Tanzania                                                                  | Miran, BM; Makundi, AE                                                                                                 | 2017 | Not found                      | As no primary data/summary statistics are presented |
| 399        | Life Science Research; New Primatology Data Have Been Reported by Investigators at Leibniz Institute for Primate Research (Fitness Impacts of Tapeworm Parasitism on Wild Gelada Monkeys at Guassa, Ethiopia) | Not set                                                                                                                | 2015 | Not found                      | As no primary data/summary statistics are presented |
| 498        | Coprological survey of alimentary tract parasites in dogs from Zambia and evaluation of a coproantigen assay for canine echinococcosis                                                                        | Nonaka, N.; Nakamura, S.; Inoue, T.; Oku, Y.; Katakura, K.; Matsumoto, J.; Mathis, A.; Chembesofu, M.; Phiri, I. G. K. | 2011 | 10.1179/2047773211Y.0000000001 | Fulltext not available                              |

Table S2. Full-text articles excluded, with reasons cont...

| Article ID | Title                                                                                                                                               | Author(s)                                                                                                  | Year | DOI                               | Criteria for exclusion                              |
|------------|-----------------------------------------------------------------------------------------------------------------------------------------------------|------------------------------------------------------------------------------------------------------------|------|-----------------------------------|-----------------------------------------------------|
| 503        | Intestinal helminths of stray dogs from Tunisia with special reference to zoonotic infections                                                       | Lahmar, Samia; Arfa, Ines; Ben Othmen, Siddik; Jguirim, Walid; Saïd, Yousra; Dhibi, Aïda; Boufana, Belgees | 2017 | 10.1017/pao.2017.21               | As no primary data/summary statistics are presented |
| 513        | Coenurosis status in Afro-Asian region: A review                                                                                                    | Sharma, D.K.; Chauhan, P.P.S.                                                                              | 2006 | 10.1016/j.smallrumres.2005.05.021 | As no primary data/summary statistics are presented |
| 552        | Taeniasis in non-descript dogs in Ngorongoro, Tanzania: Prevalence and predisposing factors                                                         | Swai, Emmanuel S.; Miran, Miran B.; Kasuku, Ayubu A.; Nzalawahe, Jahashi                                   | 2016 | 10.4102/ojvr. v83i1.1013          | As no primary data/summary statistics are presented |
| 555        | Prevalence and economic importance of Coenurus Cerebralis in sheep and goats in and around “Legahida” district of bale zone, south eastern Ethiopia | Aliye, J; Deressa, FB                                                                                      | 2017 | 10.1007/s00580-017-2404-8         | Duplicate                                           |

Table S3. PRISMA 2009 Checklist

| Section/topic | # | Checklist item | Reported on page # |
|---------------|---|----------------|--------------------|
| <b>TITLE</b>  |   |                |                    |

|                           |    |                                                                                                                                                                                                                                                                                                             |                       |
|---------------------------|----|-------------------------------------------------------------------------------------------------------------------------------------------------------------------------------------------------------------------------------------------------------------------------------------------------------------|-----------------------|
| Title                     | 1  | Identify the report as a systematic review, meta-analysis, or both.                                                                                                                                                                                                                                         | 1                     |
| <b>ABSTRACT</b>           |    |                                                                                                                                                                                                                                                                                                             |                       |
| Structured summary        | 2  | Provide a structured summary including, as applicable: background; objectives; data sources; study eligibility criteria, participants, and interventions; study appraisal and synthesis methods; results; limitations; conclusions and implications of key findings; systematic review registration number. | 1                     |
| <b>INTRODUCTION</b>       |    |                                                                                                                                                                                                                                                                                                             |                       |
| Rationale                 | 3  | Describe the rationale for the review in the context of what is already known.                                                                                                                                                                                                                              | 2-4                   |
| Objectives                | 4  | Provide an explicit statement of questions being addressed with reference to participants, interventions, comparisons, outcomes, and study design (PICOS).                                                                                                                                                  | 3-4                   |
| <b>METHODS</b>            |    |                                                                                                                                                                                                                                                                                                             |                       |
| Protocol and registration | 5  | Indicate if a review protocol exists, if and where it can be accessed (e.g., Web address), and, if available, provide registration information including registration number.                                                                                                                               | 3                     |
| Eligibility criteria      | 6  | Specify study characteristics (e.g., PICOS, length of follow-up) and report characteristics (e.g., years considered, language, publication status) used as criteria for eligibility, giving rationale.                                                                                                      | 3                     |
| Information sources       | 7  | Describe all information sources (e.g., databases with dates of coverage, contact with study authors to identify additional studies) in the search and date last searched.                                                                                                                                  | 3-4<br>Table S1/Fig 1 |
| Search                    | 8  | Present full electronic search strategy for at least one database, including any limits used, such that it could be repeated.                                                                                                                                                                               | 3<br>Table S1/Fig 1   |
| Study selection           | 9  | State the process for selecting studies (i.e., screening, eligibility, included in systematic review, and, if applicable, included in the meta-analysis).                                                                                                                                                   | Fig 1                 |
| Data collection process   | 10 | Describe method of data extraction from reports (e.g., piloted forms, independently, in duplicate) and any processes for obtaining and confirming data from investigators.                                                                                                                                  | 3                     |
| Data items                | 11 | List and define all variables for which data were sought (e.g., PICOS, funding sources) and any assumptions and simplifications made.                                                                                                                                                                       | 3                     |

|                                    |    |                                                                                                                                                                                                                        |                       |
|------------------------------------|----|------------------------------------------------------------------------------------------------------------------------------------------------------------------------------------------------------------------------|-----------------------|
| Risk of bias in individual studies | 12 | Describe methods used for assessing risk of bias of individual studies (including specification of whether this was done at the study or outcome level), and how this information is to be used in any data synthesis. | Table S3              |
| Summary measures                   | 13 | State the principal summary measures (e.g., risk ratio, difference in means).                                                                                                                                          | 6                     |
| Synthesis of results               | 14 | Describe the methods of handling data and combining results of studies, if done, including measures of consistency (e.g., $I^2$ ) for each meta-analysis.                                                              | Figure 2              |
|                                    |    |                                                                                                                                                                                                                        |                       |
| Risk of bias across studies        | 15 | Specify any assessment of risk of bias that may affect the cumulative evidence (e.g., publication bias, selective reporting within studies).                                                                           | Table S3 and Table S4 |
| Additional analyses                | 16 | Describe methods of additional analyses (e.g., sensitivity or subgroup analyses, meta-regression), if done, indicating which were pre-specified.                                                                       | Table S4              |
| <b>RESULTS</b>                     |    |                                                                                                                                                                                                                        |                       |
| Study selection                    | 17 | Give numbers of studies screened, assessed for eligibility, and included in the review, with reasons for exclusions at each stage, ideally with a flow diagram.                                                        | Figure 1              |
| Study characteristics              | 18 | For each study, present characteristics for which data were extracted (e.g., study size, PICOS, follow-up period) and provide the citations.                                                                           | Table 2               |
| Risk of bias within studies        | 19 | Present data on risk of bias of each study and, if available, any outcome level assessment (see item 12).                                                                                                              | Table S4              |
| Results of individual studies      | 20 | For all outcomes considered (benefits or harms), present, for each study: (a) simple summary data for each intervention group (b) effect estimates and confidence intervals, ideally with a forest plot.               | Table 1               |
| Synthesis of results               | 21 | Present results of each meta-analysis done, including confidence intervals and measures of consistency.                                                                                                                | Figure 2              |
| Risk of bias across studies        | 22 | Present results of any assessment of risk of bias across studies (see Item 15).                                                                                                                                        |                       |
| Additional analysis                | 23 | Give results of additional analyses, if done (e.g., sensitivity or subgroup analyses, meta-regression [see Item 16]).                                                                                                  |                       |
| <b>DISCUSSION</b>                  |    |                                                                                                                                                                                                                        |                       |

|                     |    |                                                                                                                                                                                      |     |
|---------------------|----|--------------------------------------------------------------------------------------------------------------------------------------------------------------------------------------|-----|
| Summary of evidence | 24 | Summarize the main findings including the strength of evidence for each main outcome; consider their relevance to key groups (e.g., healthcare providers, users, and policy makers). | 8-9 |
| Limitations         | 25 | Discuss limitations at study and outcome level (e.g., risk of bias), and at review-level (e.g., incomplete retrieval of identified research, reporting bias).                        | 9   |
| Conclusions         | 26 | Provide a general interpretation of the results in the context of other evidence, and implications for future research.                                                              | 9   |
| <b>FUNDING</b>      |    |                                                                                                                                                                                      |     |
| Funding             | 27 | Describe sources of funding for the systematic review and other support (e.g., supply of data); role of funders for the systematic review.                                           | 9   |

Table S4. Table of criteria for quality and strength of evidence for determinants of prevalence of coenurosis as described by Alonso et al., 2016 with modification

| Strong                                                           | Medium                                                                  | Weak                                           |
|------------------------------------------------------------------|-------------------------------------------------------------------------|------------------------------------------------|
| Determinants of prevalence were included during the study design | If the determinants of prevalence were included during the study design | Determinants of prevalence were only mentioned |

|                                                                                     |                                                                                |                                                          |
|-------------------------------------------------------------------------------------|--------------------------------------------------------------------------------|----------------------------------------------------------|
| Determinants were included in the analysis                                          | If these determinants were included in the analysis                            | Determinants of prevalence were not part of the analysis |
| Involved advanced statistics such as regression models and results were significant | Involved only in descriptive statistics and no advanced statistics carried out | No statistical analysis carried out                      |

Table S5. List of identified determinants for *T. multiceps* coenurosis prevalence in small ruminants in Africa from years 2000-2019 as described from previous individual literature based on criteria mentioned in Table S3

| Author              | Country  | Determinant of prevalence | Determinant of prevalence party of the study design? YES/NO | Included in the analysis | Type of analysis    | Strength of evidence: , Strong, Medium, Weak |
|---------------------|----------|---------------------------|-------------------------------------------------------------|--------------------------|---------------------|----------------------------------------------|
| Hughes et al., 2019 | Tanzania | Feeding brains to dogs    | Yes                                                         | Yes                      | Regression analysis | Strong                                       |

|                         |          |                          |     |     |                     |        |
|-------------------------|----------|--------------------------|-----|-----|---------------------|--------|
| Hughes et al., 2019     | Tanzania | Dog ownership            | Yes | Yes | Regression analysis | Strong |
| Beskawy et al., 2018    | Egypt    | Livestock production     | Yes | Yes | Bivariate analysis  | Strong |
| Beskawy et al., 2018    | Egypt    | system                   | Yes | Yes | Bivariate analysis  | Strong |
| Beskawy et al., 2018    | Egypt    | Dog ownership            | Yes | Yes | Bivariate analysis  | Strong |
| Beskawy et al., 2018    | Egypt    | Wild canid hosts         | Yes | Yes | Bivariate analysis  | Strong |
| Beskawy et al., 2018    | Egypt    | Livestock production     | Yes | Yes | Bivariate analysis  | Strong |
| Beskawy et al., 2018    | Egypt    | system                   | Yes | Yes | Bivariate analysis  | Strong |
| Aliye&Deressa, 2017     | Ethiopia | Not worming dogs         | Yes | Yes | Descriptive         | Medium |
| Aliye and Deressa, 2017 | Ethiopia | Dog ownership            | Yes | Yes | Descriptive         | Medium |
| Aliye and Deressa, 2017 | Ethiopia | Dog feces management     | Yes | Yes | Descriptive         | Medium |
| Aliye and Deressa, 2017 | Ethiopia | Feeding brains to dogs   | Yes | Yes | Descriptive         | Medium |
| Miran et al., 2015      | Tanzania | Not worming dogs         | No  | No  | None                | Weak   |
| Miran et al., 2015      | Tanzania | Backyard slaughter       | No  | No  | None                | Weak   |
| Miran et al., 2015      | Tanzania | Transmission and control | No  | No  | None                | Weak   |
| Miran et al., 2015      | Tanzania | knowledge                | No  | No  | None                | Weak   |
| Miran et al., 2015      | Tanzania | Feeding brains to dogs   | No  | No  | None                | Weak   |
| Miran et al., 2015      | Tanzania | Free roaming dogs        | No  | No  | None                | Weak   |
| Miran et al., 2015      | Tanzania | Free roaming dogs        | No  | No  | None                | Weak   |
| Miran et al., 2015      | Tanzania | Not deworming dogs       | No  | No  | None                | Weak   |
| Miran et al., 2015      | Tanzania | Wild canid hosts         | No  | No  | None                | Weak   |
| Amer et al., 2017       | Egypt    | Not deworming dogs       | No  | No  | None                | Weak   |
| Amer et al., 2017       | Egypt    | Backyard slaughter       | No  | No  | None                | Weak   |
| Amer et al., 2017       | Egypt    | Feeding brains to dogs   | No  | No  | None                | Weak   |
| Amer et al., 2017       | Egypt    | Free roaming dogs        | No  | No  | None                | Weak   |
| Amer et al., 2017       | Egypt    | Moving with dogs for     | No  | No  | None                | Weak   |
| Amer et al., 2017       | Egypt    | grazing                  | No  | No  | None                | Weak   |
| Amer et al., 2017       | Egypt    | Wild canid hosts         | No  | No  | None                | Weak   |
| Mengistu et al., 2017   | Ethiopia | Poor handling of offals  | Yes | No  | None                | Weak   |
| Mengistu et al., 2017   | Ethiopia | Not deworming dogs       | Yes | No  | None                | Weak   |



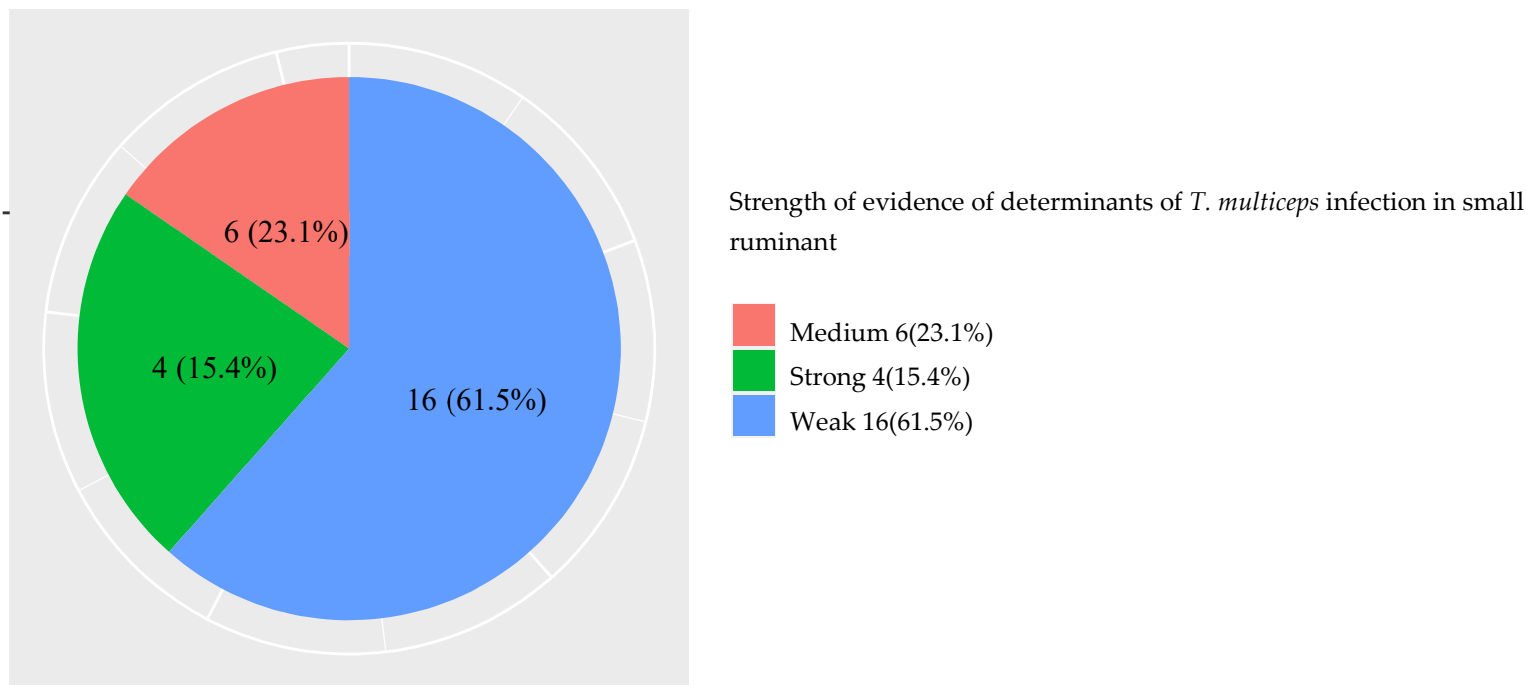

Figure S1: Strength of evidence of determinants of prevalence of *T. multiceps* coenurosis in goats and sheep in Africa year 2000 to 2019
